# Supplementary material
Source: ML conference proceedings conference paper supplement (https://proceedings.neurips.cc/paper_files/paper/2014/hash/35464c848f410e55a13bb9d78e7fddd0-Abstract.html)
Supplement: Supplementary file [file 35464c848f410e55a13bb9d78e7fddd0-Supplemental.zip]

---

# Learning with Fredholm Kernels

---

**Qichao Que   Mikhail Belkin   Yusu Wang**  
Department of Computer Science and Engineering  
The Ohio State University  
Columbus, OH 43210  
`{que, mbelkin, yusu}@cse.ohio-state.edu`

## Abstract

In this paper we propose a framework for supervised and semi-supervised learning based on reformulating the learning problem as a regularized Fredholm integral equation. Our approach fits naturally into the kernel framework and can be interpreted as constructing new data-dependent kernels, which we call Fredholm kernels. We proceed to discuss the “noise assumption” for semi-supervised learning and provide both theoretical and experimental evidences that Fredholm kernels can effectively utilize unlabeled data under the noise assumption. We demonstrate that methods based on Fredholm learning show very competitive performance in the standard semi-supervised learning setting.

## 1 Introduction

Kernel methods and methods based on integral operators have become one of the central areas of machine learning and learning theory. These methods combine rich mathematical foundations with strong empirical performance. In this paper we propose a framework for supervised and unsupervised learning as an inverse problem based on solving the integral equation known as the Fredholm problem of the first kind. We develop a regularization based algorithms for solving these systems leading to what we call Fredholm kernels.

In the basic setting of supervised learning we are given the data set  $(x_i, y_i)$ , where  $x_i \in X, y_i \in \mathbb{R}$ . We would like to construct a function  $f : X \rightarrow \mathbb{R}$ , such that  $f(x_i) \approx y_i$  and  $f$  is “nice enough” to generalize to new data points. This is typically done by choosing  $f$  from a class of functions (a Reproducing Kernel Hilbert Space (RKHS) corresponding to a positive definite kernel for the kernel methods) and optimizing a certain loss function, such as the square loss or hinge loss.

In this paper we formulate a new framework for learning based on interpreting the learning problem as a Fredholm integral equation. This formulation shares some similarities with the usual kernel learning framework but unlike the standard methods also allows for easy incorporation of unlabeled data. We also show how to interpret the resulting algorithm as a standard kernel method with a non-standard data-dependent kernel (somewhat resembling the approach taken in [14]).

We discuss reasons why incorporation of unlabeled data may be desirable, concentrating in particular on what may be termed “the noise assumption” for semi-supervised learning, which is related but distinct from manifold and cluster assumption popular in the semi-supervised learning literature. We provide both theoretical and empirical results showing that the Fredholm formulation allows for efficient denoising of classifiers.

To summarize, the main contributions of the paper are as follows:

- (1) We formulate a new framework based on solving a regularized Fredholm equation. The framework naturally combines labeled and unlabeled data. We show how this framework can be expressed as a kernel method with a non-standard data-dependent kernel.

(2) We discuss “the noise assumption” in semi-supervised learning and provide some theoretical evidence that Fredholm kernels are able to improve performance of classifiers under this assumption. More specifically, we analyze the behavior of several versions of Fredholm kernels, based on combining linear and Gaussian kernels. We demonstrate that for some models of the noise assumption, Fredholm kernel provides better estimators than the traditional data-independent kernel and thus unlabeled data provably improves inference.

(3) We show that Fredholm kernels perform well on synthetic examples designed to illustrate the noise assumption as well as on a number of real-world datasets. We also indicate how random feature approximations can be used to deal with large datasets.

## 1.1 Related work

Applications of kernel and integral methods in machine learning have a large and diverse literature (e.g., [13, 12]). The work most directly related to our approach is [10], where Fredholm integral equations were introduced to address the problem of density ratio estimation and covariate shift. In that work the problem of density ratio estimation was expressed as a Fredholm integral equation and solved using regularization in RKHS. This setting also relates to a line of work on kernel mean embedding where data points are embedded in Reproducing Kernel Hilbert Spaces using integral operators with applications to density ratio estimation and other tasks [15, 4, 5]. A very interesting recent work [9] explores a shrinkage estimator for estimating means in RKHS, following the Stein-James estimator originally used for estimating the mean in an Euclidean space. The results obtained in [9] show how such estimators can reduce variance. There is some similarity between that work and our theoretical results presented in Section 4 which also shows variance reduction for certain estimators of the kernel although in a different setting.

Another line of connected work is the class of semi-supervised learning techniques related to manifold regularization [1], where an additional graph Laplacian regularizer is added to take advantage of the geometric/manifold structure of the data. Our reformulation of Fredholm learning as a kernel, addressing what we called “noise assumptions”, parallels data-dependent kernels for manifold regularization proposed in [14].

## 2 Fredholm Kernels

We start by formulating learning framework proposed in this paper.

Suppose we are given  $l$  labeled pairs  $(x_1, y_1), \dots, (x_l, y_l)$  from the data distribution  $p(x, y)$  defined on  $X \times Y$  and  $u$  unlabeled points  $x_{l+1}, \dots, x_{l+u}$  from the marginal distribution  $p_X(x)$  on  $X$ . For simplicity we will assume that the feature space  $X$  will be a Euclidean space  $\mathbb{R}^D$ , and the label set  $Y$  is either  $\{-1, 1\}$  for binary classification or the real line  $\mathbb{R}$  for regression. Semi-supervised learning algorithms aim to construct a (predictor) function  $f : X \rightarrow Y$  by incorporating the information of unlabeled data distribution.

To this end, we introduce the integral operator  $\mathcal{K}_{p_X}$  associated with a kernel function  $k(x, z)$ . We note that  $k(x, z)$  does not have to be a positive semi-definite kernel.

$$\mathcal{K}_{p_X} : L^2 \rightarrow L^2 \text{ and } \mathcal{K}_{p_X} f(x) = \int k(x, z) f(z) p_X(z) dz, \quad (1)$$

where  $L^2$  is the space of square-integrable functions. As usual, by the law of large number, the above operator can be approximated by the unlabeled data from  $p_X$  as follows,

$$\mathcal{K}_{\hat{p}_X} f(x) = \frac{1}{l+u} \sum_{i=1}^{l+u} k(x, x_i) f(x_i). \quad (2)$$

This approximation provides a natural way of incorporating unlabeled data into algorithms. In our *Fredholm learning framework*, we will use functions in  $\mathcal{K}_{p_X} \mathcal{H} = \{\mathcal{K}_{p_X} f : f \in \mathcal{H}\}$ , where  $\mathcal{H}$  is an appropriate Reproducing Kernel Hilbert Space (RKHS) as classification or regression functions. Note that unlike RKHS, this space of functions,  $\mathcal{K}_{p_X} \mathcal{H}$ , is density dependent.

In particular, this now allows us to formulate the following optimization problem for *semi-supervised* classification/regression in a way similar to many *supervised learning* algorithms:

**The Fredholm learning framework** solves the following optimization problem<sup>1</sup>:

$$f^* = \arg \min_{f \in \mathcal{H}} \frac{1}{l} \sum_{i=1}^l ((\mathcal{K}_{\hat{p}_X} f)(x_i) - y_i)^2 + \lambda \|f\|_{\mathcal{H}}^2, \quad (3)$$

The final classifier is  $c(x) = (\mathcal{K}_{\hat{p}_X} f^*)(x)$ , where  $\mathcal{K}_{\hat{p}_X}$  is the operator defined above. Eqn 3 is a discretized and regularized version of the Fredholm integral equation  $\mathcal{K}_{p_X} f = y$ , thus giving the name of Fredholm learning framework.

Even though at first glance this setting looks similar to conventional kernel methods, the extra layer introduced by  $\mathcal{K}_{\hat{p}_X}$  makes significant difference, in particular, by allowing the integration of information from unlabelled data distribution. In contrast, solutions to kernel method for most kernels, e.g., linear, polynomial or Gaussian kernels, are completely independent of the unlabeled data. We note that our approach is closely related to [10] where a Fredholm equation is used to estimated the density ratio for two probability distributions.

Our Fredholm learning framework is a generalization of the standard kernel framework. In fact, if the kernel  $k$  is the  $\delta$ -function, then our formulation above is equivalent to the standard Regularized Least Squares equation  $f^* = \arg \min_{f \in \mathcal{H}} \frac{1}{l} \sum_{i=1}^l (f(x_i) - y_i)^2 + \lambda \|f\|_{\mathcal{H}}^2$ . We could also replace the  $L^2$  loss in Eqn 3 by other loss functions, such as hinge loss, resulting in a SVM-like classifier.

Finally, even though Eqn 3 is an optimization problem in a potentially infinite dimensional function space  $\mathcal{H}$ , we have the following lemma that allows us to apply the Representer Theorem to get a computationally accessible solution.

**Lemma 1.** *Given the definition of  $\mathcal{K}_{\hat{p}_X}$  in Eqn 2, the solution to Eqn 3 is of the form,*

$$f^*(x) = \frac{1}{l+u} \sum_{j=1}^{l+u} k_{\mathcal{H}}(x, x_j) v_j,$$

for some  $v \in \mathbb{R}^{l+u}$ .

As the proof of the above lemma is similar to that of the standard representer theorem, we put the proof in the appendix. Using the above Representer Theorem, we could transform Eqn 3 into quadratic optimization in a finite dimensional space. We can get have a closed form solution for Eqn 3 as follows:

$$f^*(x) = \frac{1}{l+u} \sum_{j=1}^{l+u} k_{\mathcal{H}}(x, x_j) v_j, \quad v = (K_{l+u}^T K_{l+u} K_{\mathcal{H}} + \lambda I)^{-1} K_{l+u}^T y, \quad (4)$$

where  $(K_{l+u})_{ij} = k(x_i, x_j)$  for  $1 \leq i \leq l, 1 \leq j \leq l+u$ , and  $(K_{\mathcal{H}})_{ij} = k_{\mathcal{H}}(x_i, x_j)$  for  $1 \leq i, j \leq l+u$ . Note that  $K_{l+u}$  is a  $l \times (l+u)$  matrix.

**Fredholm kernels: a convenient reformulation.** Interestingly, this Fredholm learning problem actually induces a new data-dependent kernel, which we will refer to as *Fredholm kernel*<sup>2</sup>. To show this connection, first observe the following identity, which can be easily verified:

**Claim 2.** *Matrix Inversion Identity*

$$(K_{l+u}^T K_{l+u} K_{\mathcal{H}} + \lambda I)^{-1} K_{l+u}^T = K_{l+u}^T (K_{l+u} K_{\mathcal{H}} K_{l+u}^T + \lambda I)^{-1}.$$

Define  $K_F = K_{l+u} K_{\mathcal{H}} K_{l+u}^T$  to be the  $l \times l$  kernel matrix associated with a new kernel defined by

$$\hat{k}_F(x, z) = \frac{1}{(l+u)^2} \sum_{i,j=1}^{l+u} k(x, x_i) k_{\mathcal{H}}(x_i, x_j) k(z, x_j), \quad (5)$$

and we consider the unlabeled data are fixed for computing this new kernel. Using this new kernel  $\hat{k}_F$ , the final classifying function  $c^*$  defined using the solution given in Eqn 4 can be rewritten as:

$$c^*(x) = \frac{1}{l+u} \sum_{i=1}^{l+u} k(x, x_i) f^*(x_i) = \sum_{s=1}^l \hat{k}_F(x, x_s) \alpha_s, \quad \alpha = (K_F + \lambda I)^{-1} y.$$

<sup>1</sup>We will be using the square loss to simplify the exposition. Other loss functions can also be used in Eqn 3.

<sup>2</sup>We note that the term ‘‘Fredholm Kernel’’ has also been used before in a different context, see page 103, [6] and [16] in the studies of Fredholm operator. But our usage and the previous one represent different object.

Because of Eqn 5 we will sometimes refer to the kernels  $k_{\mathcal{H}}$  and  $k$  as the “inner” and “outer” kernels respectively.

It can be observed that this learning algorithm can be considered as a case of the standard kernel method, but using a new data dependent kernel  $\hat{k}_F$ , which we will call the *Fredholm kernel*, since it is induced from the Fredholm problem formulated in Eqn 3. And the following proposition shows that this definition gives a positive semi-definite kernel.

**Proposition 3.** *The Fredholm kernel defined in Eqn 5 is positive semi-definite if  $k_{\mathcal{H}}$  is a positive semi-definite kernel.*

The proof is given in the appendix. The “outer” kernel  $k$  does not have to be either positive definite or even symmetric. When using Gaussian kernel for  $k$ , discrete approximation in Eqn 5 might be unstable when the kernel width is small, so we also introduce the *normalized Fredholm kernel*,

$$\hat{k}_F^N(x, z) = \frac{1}{(l+u)^2} \sum_{i,j=1}^{l+u} \frac{k(x, x_i)}{\sum_n k(x, x_n)} k_{\mathcal{H}}(x_i, x_j) \frac{k(z, x_j)}{\sum_n k(z, x_n)}. \quad (6)$$

It is easy to check that the resulting Fredholm kernel  $\hat{k}_F^N$  is still symmetric and positive semi-definite.

**Using Hinge Loss** Other than L2 loss we use above, hinge loss can also be used for our Fredholm learning framework. In this section, we explain how Fredholm kernel could be derived when using hinge loss. Plugging the hinge loss into Eqn 3, we have

$$f^* = \arg \min_{f \in \mathcal{H}} \frac{1}{l} \sum_{i=1}^l \max(0, 1 - y_i \cdot (\mathcal{K}_{\hat{p}_X} f)(x_i)) + \lambda \|f\|_{\mathcal{H}}^2. \quad (7)$$

Like the Representer Theorem, we proved in Lemma 1, the solution function  $f$  is always of the form

$$f(x) = \sum_{i=1}^{l+u} v_i k_{\mathcal{H}}(x, x_i).$$

Thus,  $\|f\|_{\mathcal{H}}^2 = \mathbf{v}^T K_{\mathcal{H}} \mathbf{v}$ , where  $K_{\mathcal{H}}$  is the kernel matrix.

And we only consider the evaluation of  $f$  at the data points, let  $\mathbf{f} = [f(x_1), \dots, f(x_{l+u})] = K_{\mathcal{H}} \mathbf{v}$ . Now we can vectorize  $(\mathcal{K}_{\hat{p}_X} f)(x_i)$  as well, by letting  $\mathbf{k}_i = [\frac{1}{l+u} k(x_i, x_1), \dots, \frac{1}{l+u} k(x_i, x_{l+u})]$ .

Thus  $\mathcal{K}_{\hat{p}_X} f(x_i) = \frac{1}{l+u} \sum_{j=1}^{l+u} k(x_i, x_j) f(x_j) = \mathbf{k}_i^T \mathbf{f} = \mathbf{k}_i^T K_{\mathcal{H}} \mathbf{v}$ .

And the optimization problem using hinge loss in Eqn 7 is equivalent to the following problem with slack variables  $\xi_i$ ,

$$\begin{aligned} \min_{f \in \mathcal{H}} \quad & \frac{1}{2} \mathbf{v}^T K_{\mathcal{H}} \mathbf{v} + C \sum_i \xi_i \\ \text{s.t.} \quad & y_i \cdot (\mathbf{k}_i^T K_{\mathcal{H}} \mathbf{v}) \geq 1 - \xi_i \\ & \xi_i \geq 0 \quad \text{for } i = 1, \dots, l \end{aligned}$$

To solve the above problem, we introduce the Lagrangian multiplier,

$$\mathcal{L}(\mathbf{v}, \xi, \alpha, \gamma) = \frac{1}{2} \mathbf{v}^T K_{\mathcal{H}} \mathbf{v} + C \sum_i \xi_i - \sum_i \alpha_i (y_i \cdot (\mathbf{k}_i^T K_{\mathcal{H}} \mathbf{v}) - 1 + \xi_i) - \sum_i \gamma_i \xi_i$$

By the KKT condition in the theory of convex optimization, we have

$$\mathbf{v} = \sum_i \alpha_i y_i \mathbf{k}_i, \quad \alpha_i = C - \gamma_i$$

Using this, we have the dual problem of the original problem in Eqn 7,

$$\begin{aligned} \max_{\alpha} \quad & \sum_i \alpha_i - \frac{1}{2} \sum_{i,j} \alpha_i \alpha_j y_i y_j \mathbf{k}_i^T K_{\mathcal{H}} \mathbf{k}_j \\ \text{s.t.} \quad & 0 \leq \alpha_i \leq C. \end{aligned}$$

It is equivalent to using Fredholm kernel for regular support vector machine, because  $\mathbf{k}_i^T K_{\mathcal{H}} \mathbf{k}_j = k_F(x_i, x_j)$  according to the definition of Fredholm kernel in Eqn 5.

### 3 The Noise Assumption and Semi-supervised Learning

In order for unlabeled data to be useful in classification tasks, it is necessary for the marginal distribution of the features to contain information about the conditional distribution of the labels. Several ways in which such information can be encoded have been proposed, including the “cluster assumption” [2] and the “manifold assumption” [1]. The cluster assumption states that a cluster (or a high density area) contains only (or mostly) points belonging to the same class. That is, if  $x_1$  and  $x_2$  belong to the same cluster, the corresponding labels  $y_1, y_2$  should be the same. The manifold assumption assumes that the regression function is smooth with respect to the underlying manifold structure of the data, which can be interpreted as saying that the geodesic distance should be used instead of the ambient distance for optimal classification. The success of algorithms based on these ideas indicates that these assumptions do capture certain characteristics of real data. Still, better understanding of data distribution may still lead to progress in data analysis.

**The noise assumption.** Now we propose to formulate a new assumption, the “noise assumption”, which is that in the neighborhood of every point, the directions with low variance (of the feature distribution) are uninformative with respect to the class labels, and can be regarded as noise. While being intuitive, as far as we know, it has not been explicitly formulated in the context of semi-supervised learning algorithms, nor applied to theoretical analysis.

Note that even if the noise variance is small along a single direction, it could still significantly decrease the performance of supervised learning algorithms if the noise are high-dimensional. These accumulated non-informative variations increase the difficulty of learning a good classifier in particular when the amount of labeled data is small. The Figure 1 on right illustrates the issue of noise with two labeled points. The seemingly optimal classification boundary (the red line) differs from the correct one (in black) due to the noisy variation along the vertical axis for the two labeled points. Intuitively unlabeled data shown in the right panel of Figure 1 can be helpful in this setting as low variance directions can be estimated locally such that algorithms could suppress the influences of the noisy variation when learning a classifier.

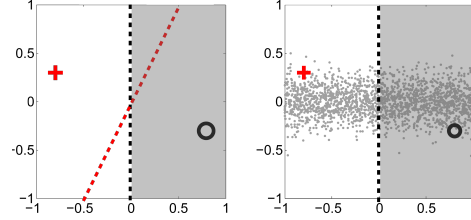

Figure 1: Left: only labelled points, and Right: with unlabelled points.

**Connection to cluster and manifold assumptions.** The noise assumption is compatible with the manifold assumption within the “manifold+noise” model. Specifically, we can assume that the functions of interest vary along the manifold and are constant in the orthogonal direction. Alternatively, we can think of directions with high variance as “signal/manifold” and directions with low variance as “noise”. We note that the noise assumption does not require the data to conform to a low-dimensional manifold in the strict mathematical sense of the word. The noise assumption is orthogonal to the cluster assumption. For example, Figure 1 illustrates a situation where data has no clusters but the noise assumption applies. For more examples and experimental results see Section 5.1.

### 4 Theoretical Results for Fredholm Kernels

Non-informative variation in data could degrade the performance of traditional supervised learning algorithms. We will now show that Fredholm kernels can be used to replace traditional kernels to inject them with “noise-suppression” power with the help of unlabelled data. In this section we will present two views to illustrate how such noise suppression can be achieved. Specifically, in Section 4.1) we show that under certain setup linear Fredholm kernel suppresses principal components with small variance. In Section 4.2) we prove that under certain conditions Fredholm kernels are able to provide good approximations to the “true” kernel on the hidden underlying space.

To make our arguments more clear, in what follows, we assume that there is infinite amount of unlabelled data; that is, we know the marginal distribution of data exactly. We will then consider the following continuous versions of the un-normalized and normalized Fredholm kernels as in Eqn 5

and 6:

$$k_F^U(x, z) = \int \int k(x, u) k_{\mathcal{H}}(u, v) k(z, v) p(u) p(v) du dv \quad (8)$$

and

$$k_F^N(x, z) = \int \int \frac{k(x, u)}{\int k(x, w) p(w) dw} k_{\mathcal{H}}(u, v) \frac{k(z, v)}{\int k(z, w) p(w) dw} p(u) p(v) du dv. \quad (9)$$

Note, in the above equations and in what follows, we sometimes write  $p$  instead of  $p_X$  for the marginal distribution when its choice is clear from context. We will typically use  $k_F$  to denote appropriate normalized or unnormalized kernels depending on the context.

#### 4.1 Linear Fredholm kernels and inner products

For this section, we consider the unnormalized Fredholm kernel, that is  $k_F = k_F^U$ . If the “outer” kernel  $k(u, v)$  is linear, i.e.  $k(u, v) = u^T v$ , the resulting Fredholm kernel can be viewed as an inner product. Specifically, the un-normalized Fredholm kernel from Eqn 8 can be rewritten as

$$k_F(x, z) = \int \int (x^T u)(z^T v) k_{\mathcal{H}}(u, v) p(u) p(v) du dv = x^T \Sigma_F z, \text{ where} \\ \Sigma_F = \int \int uv^T k_{\mathcal{H}}(u, v) p(u) p(v) du dv = \int \int u k_{\mathcal{H}}(u, v) v^T p(u) p(v) du dv. \quad (10)$$

Thus  $k_F(x, z)$  is simply an inner product which depends on both the data distribution  $p(x)$  and the “inner” kernel  $k_{\mathcal{H}}$ . This inner product re-weights the standard norm in feature space based on variances along the principal directions of the matrix  $\Sigma_F$ . We will show that for the model when data is sampled from a normal distribution this kernel can be viewed as a “soft thresholding” PCA, suppressing the directions with low variance.

More strictly, we have the following

**Theorem 4.** Let  $k_{\mathcal{H}}(x, z) = \exp\left(-\frac{\|x-z\|^2}{2t}\right)$  and assume the marginal distribution  $p_X$  for data is a single multi-variate normal distribution,  $N(\mu, \text{diag}(\sigma_1^2, \dots, \sigma_d^2))$ . We have

$$\Sigma_F = \left( \prod_{d=1}^D \sqrt{\frac{t}{2\sigma_d^2 + t}} \right) \left( \mu \mu^T + \text{diag} \left( \frac{\sigma_1^4}{2\sigma_1^2 + t}, \dots, \frac{\sigma_D^4}{2\sigma_D^2 + t} \right) \right).$$

Assuming that the data is mean-subtracted, i.e.  $\mu = 0$ , we see that  $x^T \Sigma_F z$  re-scales the projections along the principal components when computing the inner product; that is, the rescaling factor for the  $i$ th principal direction is  $\sqrt{\frac{\sigma_i^4}{2\sigma_i^2 + t}}$ .

Note that this rescaling factor  $\frac{\sigma_i^4}{2\sigma_i^2 + t} \approx 0$  when  $\sigma_i^2 \ll t$ . On the other hand when  $\sigma_i^2 \gg t$ , we have that  $\frac{\sigma_i^4}{2\sigma_i^2 + t} \approx \frac{\sigma_i^2}{2}$ . Hence  $t$  can be considered as a *soft threshold* that eliminates the effects of principal components with small variances. When  $t$  is small the rescaling factors are approximately proportional to  $\text{diag}(\sigma_1^2, \sigma_2^2, \dots, \sigma_D^2)$ , in which case  $\Sigma_F$  is proportional to the covariance matrix of the data  $XX^T$ .

#### 4.2 Kernel Approximation With Noise

We have seen that one special case of Fredholm kernel could achieve the effect of principal components re-scaling by using linear kernel as the “outer” kernel  $k$ . In this section we give a more general interpretation of noise suppression by the Fredholm kernel.

First, we give a simple senario to provide some intuition behind the definition of Fredholm kernle. Consider a standard supervised learning setting which uses the solution  $f^* = \arg \min_{f \in \mathcal{H}} \frac{1}{l} \sum_{i=1}^l (f(x_i) - y_i)^2 + \lambda \|f\|_{\mathcal{H}}^2$  as the classifier. Let  $k_{\mathcal{H}}^{\text{target}}$  denote the ideal kernel that we intend to use on the clean data, which we call the *target kernel* from now on. Now suppose what we have are two noisy labeled points  $x_e$  and  $z_e$  for “true” data  $\bar{x}$  and  $\bar{z}$ , i.e.  $x_e = \bar{x} + \varepsilon_x$ ,  $z_e = \bar{z} + \varepsilon_z$ .

The evaluation of  $k_{\mathcal{H}}^{\text{target}}(x_e, z_e)$  can be quite different from the true signal  $k_{\mathcal{H}}^{\text{target}}(\bar{x}, \bar{z})$ , leading to a suboptimal final classifier (the red line in Figure 1 (a)). On the other hand, now consider the Fredholm kernel from Eqn 8 (or similarly from Eqn 9):  $k_F(x_e, z_e) = \int \int k(x_e, u)p(u) \cdot k_{\mathcal{H}}(u, v) \cdot k(z_e, v)p(v)dudv$ , and set the outer kernel  $k$  to be the Gaussian kernel, and the inner kernel  $k_{\mathcal{H}}$  to be the same as target kernel  $k_{\mathcal{H}}^{\text{target}}$ . We can think of  $k_F(x_e, z_e)$  as an averaging of  $k_{\mathcal{H}}(u, v)$  over all possible pairs of data  $u, v$ , weighted by  $k(x_e, u)p(u)$  and  $k(z_e, v)p(v)$  respectively. Specifically, points that are close to  $x_e$  (resp.  $z_e$ ) with high density will receive larger weights. Hence the weighted averages will be biased towards  $\bar{x}$  and  $\bar{z}$  respectively (which presumably lie in high density regions around  $x_e$  and  $z_e$ ). The value of  $k_F(x_e, z_e)$  tends to provide a more accurate estimate of  $k_{\mathcal{H}}(\bar{x}, \bar{z})$ . See the right figure for an illustration where the arrows indicate points with stronger influences in the computation of  $k_F(x_e, z_e)$  than  $k_{\mathcal{H}}(x_e, z_e)$ . As a result, the classifier obtained using the Fredholm kernel will also be more resilient to noise and closer to the optimum.

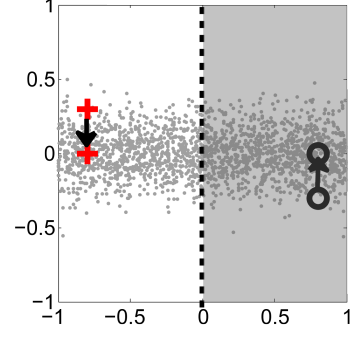

The Fredholm learning framework is rather flexible in terms of the choices of kernels  $k$  and  $k_{\mathcal{H}}$ . In the remainder of this section, we will consider a few specific scenarios and provide quantitative analysis to show the noise-resiliency of the Fredholm kernel. In particular, for Section 4.2.1 and 4.2.2, we will assume the following setup for data.

**Problem setup.** Assume that we have a ground-truth distribution over the subspace spanned by the first  $d$  dimension of the Euclidean space  $\mathbb{R}^D$ . We will assume that this ground-truth distribution is a single Gaussian  $N(0, \lambda^2 I_d)$ . Now imagine that this ground-truth distribution is corrupted with Gaussian noise along the orthogonal subspace of dimension  $D - d$ . That is, for any observed point  $x_e$ , it could be decomposed into  $\bar{x} + \varepsilon_x$ , where the signal  $\bar{x}$  is drawn from  $N(0, \lambda^2 I_d)$ , and the noise  $\varepsilon_x$  is drawn from  $N(0, \sigma^2 I_{D-d})$  over the orthogonal space. Thus any observed point, labelled or unlabelled, is sampled from  $p_X = N(0, \text{diag}(\lambda^2 I_d, \sigma^2 I_{D-d}))$ , with the first  $d$  dimensions as signals and the rest corrupted by noises.

We will show that Fredholm kernel provides a better approximation to the “original” kernel given both labeled and unlabeled data than directly computing the kernel evaluation at noisy labeled points.

We choose this simple setting so as to be able to state the theoretical results in a clean manner. Even though this is just a Gaussian distribution over a linear subspace with noise this framework can be generalized since local neighborhoods of a Riemannian manifold can be approximated by linear spaces.

**Note.** In this section, we use the normalized Fredholm kernel given in Eqn 9 for simplicity, that is  $k_F = k_F^N$  for now on. Un-normalized Fredholm kernel displays similar behavior, however, the theoretical bounds are more complicated.

#### 4.2.1 Linear Kernel

First we consider the case where the target kernel  $k_{\mathcal{H}}^{\text{target}}(u, v)$  is the linear kernel,  $k_{\mathcal{H}}^{\text{target}}(u, v) = u^T v$ . We will set  $k_{\mathcal{H}}$  in Fredholm kernel to also be linear, and  $k$  to be the Gaussian kernel  $k(u, v) = e^{-\frac{\|u-v\|^2}{2t}}$ . We will compare  $k_F(x_e, z_e)$  with the target kernel on the two observed points, that is, with  $k_{\mathcal{H}}^{\text{target}}(x_e, z_e)$ . The goal is to estimate  $k_{\mathcal{H}}^{\text{target}}(\bar{x}, \bar{z})$ . We will see that (1) both  $k_F(x_e, z_e)$  and (appropriately scaled)  $k_{\mathcal{H}}(x_e, z_e)$  are unbiased estimators of  $k_{\mathcal{H}}^{\text{target}}(\bar{x}, \bar{z})$ , however (2) the variance of  $k_F(x_e, z_e)$  is smaller than that of  $k_{\mathcal{H}}^{\text{target}}(x_e, z_e)$ , making it a more precise estimator.

**Theorem 5.** Suppose the probability distribution for the data is  $p_X = N(0, \text{diag}(\lambda^2 I_d, \sigma^2 I_{D-d}))$ . For Fredholm kernel defined in Eqn 9, we have

$$\mathbb{E}_{x_e, z_e}(k_{\mathcal{H}}^{\text{target}}(x_e, z_e)) = \mathbb{E}_{x_e, z_e}\left(\left(\frac{t + \lambda^2}{\lambda^2}\right)^2 k_F(x_e, z_e)\right) = \bar{x}^T \bar{z}$$

Moreover, when  $\lambda > \sigma$ ,  $\text{Var}_{x_e, z_e}\left(\left(\frac{t + \lambda^2}{\lambda^2}\right)^2 k_F(x_e, z_e)\right) < \text{Var}_{x_e, z_e}(k_{\mathcal{H}}^{\text{target}}(x_e, z_e))$ .

**Remark:** Note that we have a normalization constant for the Fredholm kernel to make it an unbiased estimator of  $\bar{x}^T \bar{z}$ . In practice, choosing normalization is subsumed in selecting the regularization parameter for kernel methods.

We will give a sketch of the proof, complete details can be found in the appendix.

First, we have the following lemma regarding the estimator  $k_{\mathcal{H}}^{\text{target}}(x_e, z_e)$ .

**Lemma 6.** *Given two samples  $x_e \sim N(\bar{x}, \text{diag}([\mathbf{0}_d, \sigma^2 I_{D-d}]))$ ,  $z_e \sim N(\bar{z}, \text{diag}([\mathbf{0}_d, \sigma^2 I_{D-d}]))$ , let  $k_{\mathcal{H}}(x_e, z_e) = x_e^T z_e$ . We have:*

$$\mathbb{E}_{x_e, z_e}(k_{\mathcal{H}}^{\text{target}}(x_e, z_e)) = \bar{x}^T \bar{z} \text{ and } \text{Var}_{x_e, z_e}(k_{\mathcal{H}}^{\text{target}}(x_e, z_e)) = (D - d)\sigma^4.$$

Now we consider the Fredholm kernel with the help of unlabelled points from the distribution  $p = N(\mathbf{0}, \text{diag}(\lambda^2 I_d, \sigma^2 I_{D-d}))$ . Substituting  $k_{\mathcal{H}}(u, v)$  by the linear kernel  $u^T v$  in Eqn 9, we have:

$$\begin{aligned} k_F(x_e, z_e) &= \int \int \frac{k(x_e, u)}{\int k(x_e, w)p(w)dw} \frac{k(z_e, v)}{\int k(z_e, w)p(w)dw} u^T v p(u)p(v) du dv \\ &= \left( \int \frac{k(x_e, u)u p(u)du}{\int k(x_e, w)p(w)dw} \right)^T \left( \int \frac{k(z_e, v)v p(v)dv}{\int k(z_e, w)p(w)dw} \right) \end{aligned} \quad (11)$$

where recall  $k(u, v) = \exp\left(-\frac{\|u-v\|^2}{2t}\right)$ . Note  $\frac{\int k(x_e, u)u p(u)du}{\int k(x_e, w)p(w)dw}$  (resp.  $\int \frac{k(z_e, v)v p(v)dv}{\int k(z_e, w)p(w)dw}$ ) is the weighted mean of the unlabeled data, with the weight function being the normalized Gaussian kernel centered at  $x_e$  (resp.  $z_e$ ). Hence by Eqn 11,  $k_F(x_e, z_e)$  is the linear kernel between these two means (instead of the linear kernel for  $x_e$  and  $z_e$ ). Thus it is not too surprising that  $k_F(x_e, z_e)$  should be more stable than the straightforward approximation  $k_{\mathcal{H}}(x_e, z_e)$ . Indeed, we have the following lemma (proof in appendix).

**Lemma 7.** *Given two samples  $x_e \sim N(\bar{x}, \text{diag}([\mathbf{0}_d, \sigma^2 I_{D-d}]))$ ,  $z_e \sim N(\bar{z}, \text{diag}([\mathbf{0}_d, \sigma^2 I_{D-d}]))$ , let  $k_{\mathcal{H}}(x_e, z_e) = x_e^T z_e$  and  $p = N(\mathbf{0}, \text{diag}(\lambda^2 I_d, \sigma^2 I_{D-d}))$ . Let  $k_F$  be as defined in Eqn 11. We have:*

$$\mathbb{E}_{x_e, z_e} \left( \left( \frac{t + \lambda^2}{\lambda^2} \right)^2 k_F(x_e, z_e) \right) = \bar{x}^T \bar{z}$$

and

$$\text{Var}_{x_e, z_e} \left( \left( \frac{t + \lambda^2}{\lambda^2} \right)^2 k_F(x_e, z_e) \right) = (D - d) \left( \frac{\sigma^2(t + \lambda^2)}{\lambda^2(t + \sigma^2)} \right)^4 \sigma^4$$

With Lemma 6 and 7, we can now compare the variances. Since  $\frac{\sigma^2(t + \lambda^2)}{\lambda^2(t + \sigma^2)} < 1$  when  $\lambda^2 > \sigma^2$ , Theorem 5 follows.

Thus we can see the Fredholm kernel provides an approximation of the “true” linear kernel, but with smaller variance than the linear kernel on noisy data.

#### 4.2.2 Gaussian Kernel

We now consider the case where the target kernel is the Gaussian kernel:  $k_{\mathcal{H}}^{\text{target}}(u, v) = \exp\left(-\frac{\|u-v\|^2}{2r}\right)$ . To approximate this kernel, we will set both  $k$  and  $k_{\mathcal{H}}$  to be Gaussian kernels. To simplify the presentation of results, we assume that  $k$  and  $k_{\mathcal{H}}$  have the same kernel width  $t$ . The resulting Fredholm kernel turns out to also be a Gaussian kernel, whose kernel width depends on the choice of  $t$ .

Our main result is the following. Again, similar to the case of linear kernel, the Fredholm estimator  $k_F(x_e, z_e)$  and the vanilla one  $k_{\mathcal{H}}^{\text{target}}(x_e, z_e)$  are both unbiased estimator for the target  $k_{\mathcal{H}}^{\text{target}}(\bar{x}, \bar{z})$  upto a constant; but  $k_F(x_e, z_e)$  has a smaller variance.

**Theorem 8.** *Suppose the probability distribution for the unlabeled data  $p_X = N(\mathbf{0}, \text{diag}(\lambda^2 I_d, \sigma^2 I_{D-d}))$ . Given the target kernel  $k_{\mathcal{H}}^{\text{target}}(u, v) = \exp\left(-\frac{\|u-v\|^2}{2r}\right)$  with kernel width  $r > 0$ , we can choose  $t$ , given by the equation  $\frac{t(t + \lambda^2)(t + 3\lambda^2)}{\lambda^4} = r$ , and two scaling constants  $c_1, c_2$ , such that*

$$\mathbb{E}_{x_e, z_e}(c_1^{-1} k_{\mathcal{H}}^{\text{target}}(x_e, z_e)) = \mathbb{E}_{x_e, z_e}(c_2^{-1} k_F(x_e, z_e)) = k_{\mathcal{H}}^{\text{target}}(\bar{x}, \bar{z}).$$



and when  $\lambda^2 > \sigma^2$ , we have  $\text{Var}_{x_e, z_e}(c_1^{-1}k_{\mathcal{H}}^{\text{target}}(x_e, z_e)) > \text{Var}_{x_e, z_e}(c_2^{-1}k_F(x_e, z_e))$ .

**Remark.** In practice, when applying kernel methods for real world applications, optimal kernel width  $r$  is usually unknown and chosen by cross-validation or other methods. Similarly, for our Fredholm kernel, one can also use cross-validation to choose the optimal  $t$  for  $k_F$ .

The proof of Theorem 8 is more complicated than in the linear case, and can be found in the appendix.

## 5 Experiments

In this section, we will demonstrate our Fredholm kernel empirically using both synthetic examples and data sets of text categorization and handwriting recognition. In section 5.1, we will use several examples to illustrate the effect of reducing variances using Fredholm kernel and how noise assumption is distinguished from the conventional assumptions in semi-supervised learning, such as cluster assumption and manifold assumption. In section 5.2, we show how classifiers based on Fredholm kernel perform on real world data sets like hand-written digits recognition and text categorization problems, compared with other semi-supervised algorithms.

First recall the Fredholm kernel we defined in previous section.

$$\hat{k}_F(x, z) = \frac{1}{(l+u)^2} \sum_{i,j=1}^{l+u} k(x, x_i) k_{\mathcal{H}}(x_i, x_j) k(z, x_j).$$

And using linear and Gaussian kernel for  $k$  or  $k_{\mathcal{H}}$ , we can define three instances of the Fredholm kernel as follows.

(1) FredLin1:  $k(x, z) = x^T z$  and  $k_{\mathcal{H}}(x, z) = \exp\left(-\frac{\|x-z\|^2}{2r}\right)$ .

(2) FredLin2:  $k(x, z) = \exp\left(-\frac{\|x-z\|^2}{2r}\right)$  and  $k_{\mathcal{H}}(x, z) = x^T z$ .

(3) FredGauss:  $k(x, z) = k_{\mathcal{H}}(x, z) = \exp\left(-\frac{\|x-z\|^2}{2r}\right)$ .

For the kernels in (2) and (3) that use the Gaussian kernel as outside kernel  $k$ , intuitively we can also define their normalized version using the following definition,

$$\hat{k}_{F,n}(x, z) = \frac{1}{(l+u)^2} \sum_{i,j=1}^{l+u} \frac{k(x, x_i)}{\sum_n k(x, x_n)} k_{\mathcal{H}}(x_i, x_j) \frac{k(z, x_j)}{\sum_n k(z, x_n)}.$$

The resulting kernels are denoted by FredLin2(N) and FredGauss(N) respectively.

### 5.1 Synthetic Examples

Using specially designed toy examples, we could empirically verify the behavior of Fredholm kernel characterized by theoretical results in last section.

#### 5.1.1 Principal Component Regression

As we have pointed out in Theorem 4, Fredholm kernel and the associated Fredholm inner product space could stress the principal components with larger variances while suppressing the ones with smaller variances. Instead of hard cutting-off in many PCA-based methods, it provides a soft thresholding algorithm for feature selection. To demonstrate our methods, we consider the principal component regression problem [8], which assumes that the regressor  $X$  and response  $Y$  have the following relationship:

$$Y = \alpha X u_1,$$

where  $u_1$  is the first principal component. In this experiments, the data distribution is a Gaussian distribution  $N(0, \text{diag}([10, 1, \dots, 1]))$ . Note that the axes themselves are the principal components. We will compare our method with linear regression using (1) all the dimensions; and (2) first  $k$  principal components, while Fredholm kernel does not need to do any hard thresholding. Figure 2

shows the error of regression using Fredholm linear kernel or the projections to the first  $k$  principal components. In the experiments, we use 2000 unlabeled data for Fredholm kernel and PCA. The horizontal axis indicates different numbers of training points we used for training the regression. It can be observed that Fredholm kernel performs better than regression using the first  $k$  principal components, unless the right number of principal components is chosen correctly, which is a non-trivial problem in practice.

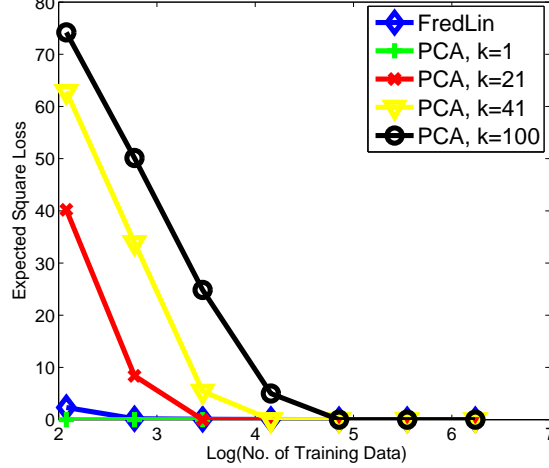

Figure 2: The error of regression using Fredholm linear kernel or the projections to the first  $k$  principal components.

### 5.1.2 Noise and cluster assumptions

Semi-supervised learning algorithms have shown better performance on various classification problems than the supervised learning algorithms. For example, [7] showed TSVM achieved the state of art performance on the problem of text categorization, and manifold regularization also showed good performance on various applications [1].

As we pointed out before, Fredholm kernel could deal with the noise assumption, which is distinct from the commonly used cluster assumption in many semi-supervised learning algorithms. To demonstrate our point, we use two toy examples that obviously violate the cluster assumption, shown in Figure 3. Each example is based on 1-dimensional manifold(s), and corrupted with additional Gaussian noise in  $\mathbb{R}^{100}$ . We assign the label to each point as we indicate in the figure by color. For each class, we will give a few labeled points, and large amount of unlabeled points from the marginal data distribution  $p_X$ . Since the data points are sampled around the underlying manifold, they served as two concrete examples of noise assumption, one for linear separable and the other for the non-linear separable case.

In our experiments, we compare Fredholm kernel based classifier with Regularized Least Square Classifier (RLSC), and two widely used semi-supervised methods, the transductive support vector machine (TSVM) and LapRLSC. Since the examples violate the cluster assumption, the two existing semi-supervised learning algorithms, TSVM and LapRLSC, should not gain much from the unlabeled data. For TSVM, we use the primal TSVM proposed in [3], since they claim primal TSVM usually performs better than the original algorithm in [7]; and we will use the implementation of LapRLSC given in [1]. For the linear separable case, linear classifiers are trained using these methods, while for the circular case, we will leverage Gaussian kernel to obtain a non-linear classifier. Similarly, we use the two linear Fredholm kernels introduced in Section 4.1 and 4.2.1, denoted by FredLin1 and FredLin2, for the first toy example; and we use the double-Gaussian Fredholm kernel for the second circular toy example. Different numbers of labeled points are given for each class, together with another 2000 unlabeled points. To choose the optimal parameters for each method, we pick the parameters based on their performance on the validation set, while the final classification error is computed on the held-out testing data set. The classification error is presented in

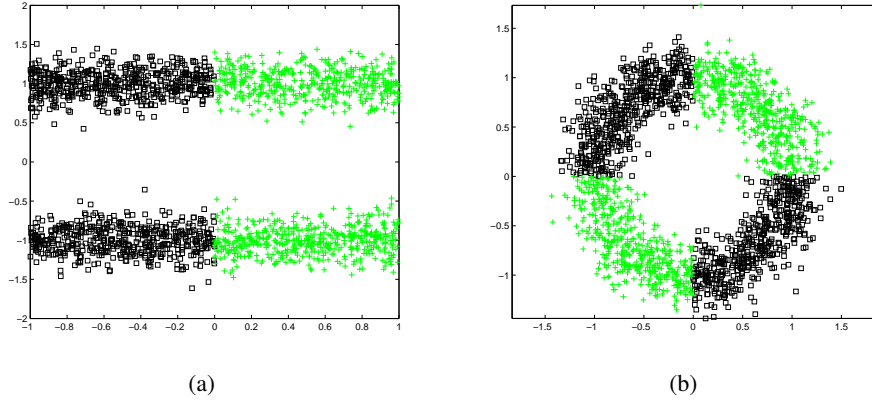

Figure 3: Two toy examples used to demonstrate the noise assumption.

Table 1 and 2, in which Fredholm kernels show clear improvement over other methods for synthetic examples in term of classification error.

| Number of Labeled | Methods          |                 |                  |                         |                 |
|-------------------|------------------|-----------------|------------------|-------------------------|-----------------|
|                   | RLSC             | TSVM            | LapRLSC          | FredLin1                | FredLin2(N)     |
| 8                 | 10.0( $\pm$ 3.9) | 5.2( $\pm$ 2.2) | 10.0( $\pm$ 3.5) | <b>3.7</b> ( $\pm$ 2.6) | 4.5( $\pm$ 2.1) |
| 16                | 9.1( $\pm$ 1.9)  | 5.1( $\pm$ 1.1) | 9.1( $\pm$ 2.2)  | <b>2.9</b> ( $\pm$ 2.0) | 3.6( $\pm$ 1.9) |
| 32                | 5.8( $\pm$ 3.2)  | 4.5( $\pm$ 0.8) | 6.0( $\pm$ 3.2)  | <b>2.3</b> ( $\pm$ 2.3) | 2.6( $\pm$ 2.2) |

Table 1: The prediction error of the different classifiers on the linear toy example.

| Number of Labeled | Methods          |                  |                  |                         |
|-------------------|------------------|------------------|------------------|-------------------------|
|                   | RLSC             | TSVM             | LapRLSC          | FredGauss(N)            |
| 16                | 17.4( $\pm$ 5.0) | 32.2( $\pm$ 5.2) | 17.0( $\pm$ 4.6) | <b>7.1</b> ( $\pm$ 2.4) |
| 32                | 16.5( $\pm$ 7.1) | 29.9( $\pm$ 9.3) | 18.0( $\pm$ 6.8) | <b>6.0</b> ( $\pm$ 1.6) |
| 64                | 8.7( $\pm$ 1.7)  | 20.3( $\pm$ 4.2) | 9.7( $\pm$ 2.0)  | <b>5.5</b> ( $\pm$ 0.7) |

Table 2: The prediction error of the different classifiers on the circular toy example.

## 5.2 Real-world Data Sets

Unlike toy examples, it is usually very difficult to verify whether certain assumption is satisfied or not in real problems. In this section, we will try to demonstrate the performance of Fredholm kernel on several real-world data sets and compare it with the baseline algorithms we used for toy examples. We organize the experiments by the kernel used for the classifiers. For example, in text categorization problem, linear kernel over the tfidf feature space usually gives great performance; and for handwriting digits recognition, Gaussian kernel usually performs better than using linear kernel. In the following experiments, we will apply several instances of Fredholm kernel to different data sets including text categorization and the handwritten digits recognition problem.

### 5.2.1 Linear Kernel

In this section, we will consider the problem of text categorization, which is a classic example for many semi-supervised learning problems. It labels each article or webpage by its topic. Recently, sentiment analysis has been another trending problem in text mining. It tries to categorize each short text, such as tweets or movie review, into positive or negative. And this problem is more subtle than the traditional text categorization, since sentiment is usually very tricky to detect and the text for this problem is usually shorter. In this experiment, we use the following 4 data sets from the literature:

- (1) 20 news group: it has 11269 documents with 20 classes, and we select the first 10 categories for our experiment.
- (2) Webkb: the original data set contains 7746 documents with 7 unbalanced classes, and we pick the two largest classes with 1511 and 1079 instances respectively.
- (3) IMDB movie review: it has 1000 positive reviews and 1000 negative reviews of movie on IMDB.com.
- (4) Twitter sentiment data set from Sem-Eval 2013: it contains 5173 tweets, with positive, neutral and negative sentiment, and we combine neutral and negative classes to make a relatively balanced binary classification problem.

For each data set, we extract tfidf from every document as the feature. Given the high dimensionality of tfidf feature in most cases, using linear kernel usually gives a great performance for text categorization problem.

For each data sets, we will use Fredholm kernels (1) and (2), which have a similar behavior with linear kernel, but perform much better. We will use the purely supervised RLSC, and semi-supervised Transductive SVM as baseline methods for comparison. Note that we use the implementation in [3] for TSVM, since they claim to achieve comparable performance while having a more simple algorithm using primal optimization.

To adapt the original data sets for the purpose of semi-supervised learning, we randomly pick-up a few points as labeled ones for each class, and use the rest of the data set as unlabeled points. And this splitting will be repeated for 10 times to estimate an average performance. Due to limited number of labeled points does not allow cross-validation, we pick the optimal parameter on testing data for all methods. The regularization parameter needs to be chosen for all methods, while we need to choose an extra kernel width for Fredholm kernel.

To measure the performance, we use the prediction error, the percentage of data gotten classified incorrectly. The experiments are given in Table 3. To further explore the influence of number of labeled points for each methods, we vary the amount of labeled points from 10 per class to 80 per class on Webkb data sets. And the performance for each methods is shown in Table 4.

| Data Set | Methods          |                  |                          |                          |                          |
|----------|------------------|------------------|--------------------------|--------------------------|--------------------------|
|          | RLSC             | TSVM             | FredLin1                 | FredLin2                 | FredLin2(N)              |
| Webkb    | 16.9( $\pm$ 1.4) | 12.7( $\pm$ 0.8) | 13.0( $\pm$ 1.3)         | <b>12.0</b> ( $\pm$ 1.6) | <b>12.0</b> ( $\pm$ 1.6) |
| 20news   | 22.2( $\pm$ 1.0) | 21.0( $\pm$ 0.9) | <b>20.5</b> ( $\pm$ 0.7) | <b>20.5</b> ( $\pm$ 0.7) | <b>20.5</b> ( $\pm$ 0.7) |
| IMDB     | 30.0( $\pm$ 2.0) | 20.2( $\pm$ 2.6) | <b>19.9</b> ( $\pm$ 2.3) | 21.7( $\pm$ 2.9)         | 21.7( $\pm$ 2.7)         |
| Twitter  | 38.7( $\pm$ 1.1) | 37.6( $\pm$ 1.4) | <b>37.4</b> ( $\pm$ 1.2) | <b>37.4</b> ( $\pm$ 1.2) | 37.5( $\pm$ 1.2)         |

Table 3: The error of various methods on the text data sets. 20 labeled data per class are given with rest of the data set as unlabeled points.

| Number of Labeled | Methods          |                          |                  |                          |                          |
|-------------------|------------------|--------------------------|------------------|--------------------------|--------------------------|
|                   | RLSC             | TSVM                     | FredLin1         | FredLin2                 | FredLin2(N)              |
| 10                | 20.7( $\pm$ 2.4) | <b>13.5</b> ( $\pm$ 0.5) | 14.8( $\pm$ 2.4) | 14.6( $\pm$ 2.4)         | 14.6( $\pm$ 2.3)         |
| 20                | 16.9( $\pm$ 1.4) | 12.7( $\pm$ 0.8)         | 13.0( $\pm$ 1.3) | <b>12.0</b> ( $\pm$ 1.6) | <b>12.0</b> ( $\pm$ 1.6) |
| 80                | 10.9( $\pm$ 1.4) | 9.7( $\pm$ 1.0)          | 8.1( $\pm$ 1.0)  | <b>7.9</b> ( $\pm$ 0.9)  | <b>7.9</b> ( $\pm$ 0.9)  |

Table 4: The prediction error on Webkb, with different number of labeled points, varying from 10 per class to 80 per class.

### 5.2.2 Gaussian Kernel

As we shown in Section 4.2.2, Fredholm kernel could also provide a more stable estimator for Gaussian kernel, when the Gaussian kernel is used for both  $k$  and  $k_H$ . To demonstrate this effect, we try to solve the problem of handwriting digits recognition. We choose this problem since it is non-linear separable and Gaussian kernel tends to give better performance than linear kernel empirically. The experiment uses subsets of two handwriting digits data sets MNIST and USPS: (1) the one from

| Data Set | Methods           |                           |                   |                   |
|----------|-------------------|---------------------------|-------------------|-------------------|
|          | KRLSC             | LapRLSC                   | FredGauss         | FredGauss(N)      |
| USPST    | 11.8( $\pm 1.4$ ) | <b>10.2</b> ( $\pm 0.5$ ) | 12.4( $\pm 1.8$ ) | 10.8( $\pm 1.1$ ) |
| MNIST    | 14.3( $\pm 1.2$ ) | <b>8.6</b> ( $\pm 1.2$ )  | 12.2( $\pm 1.0$ ) | 13.0( $\pm 0.9$ ) |

Table 5: The prediction error of nonlinear classifiers on the handwriting digits recognition data sets. 20 labeled data per class are given with rest of the data set as unlabeled points.

MNIST contains 10k digits in total with balanced examples for each class, and the one for USPS is the original testing set containing about 2k images. The pixel values are normalized to  $[0, 1]$  as features.

For comparison, we also build classifiers using kernel RLSC and another semi-supervised algorithm, manifold regularization, which is known to perform very well on handwriting digits recognition when using Gaussian kernel. The results are presented in Table 5.

In Table 6, we show that as we add additional Gaussian noise to MNIST data, Fredholm kernels start to show significant improvement.

| Number of Labeled | Methods           |                    |                           |                   |
|-------------------|-------------------|--------------------|---------------------------|-------------------|
|                   | KRLSC             | LapRLSC            | FredGauss                 | FredGauss(N)      |
| 10                | 34.1( $\pm 2.1$ ) | 35.6 ( $\pm 3.5$ ) | <b>27.9</b> ( $\pm 1.6$ ) | 29.0( $\pm 1.5$ ) |
| 20                | 27.2( $\pm 1.1$ ) | 27.3 ( $\pm 1.8$ ) | <b>21.9</b> ( $\pm 1.2$ ) | 22.9( $\pm 1.2$ ) |
| 40                | 20.0( $\pm 0.7$ ) | 20.3 ( $\pm 0.8$ ) | <b>17.3</b> ( $\pm 0.5$ ) | 18.4( $\pm 0.4$ ) |
| 80                | 15.6( $\pm 0.4$ ) | 15.6 ( $\pm 0.5$ ) | <b>14.8</b> ( $\pm 0.6$ ) | 15.4( $\pm 0.5$ ) |

Table 6: The prediction error of nonlinear classifiers on MNIST corrupted with Gaussian noise with standard deviation 0.3 with different numbers of labeled points, from 10 to 80.

Note that we do not present the result for TSVM for this experiment, since an explicit feature map needs to be constructed for the primal optimization. Such feature map is usually only an approximation, which might downgrade its performance.

### 5.3 Efficient Implementation Using Random Features

Even though kernel method has achieved significant success over the last decade, it usually suffers from the issue of scaling-up, due to the memory consumption quadratic to the size of the training data. It has inspired a line of research to solve this issue. For example, the random Fourier feature was proposed in [11]. This provides a way to efficiently approximate the several popular kernels, only requiring linear size of memory. Key idea of random Fourier features comes from the fact that every positive semi-definite kernel is the Fourier transform of a probability distribution by Bochner's theorem,

$$k(x - y) = \int_{\mathbb{R}^d} p(\omega) e^{i\omega'(x-y)} d\omega = \mathbb{E}_{\omega}(\xi_{\omega}(x) \xi_{\omega}(y)^*),$$

where  $\xi_{\omega}(x) = e^{i\omega'x}$ . For certain kinds of kernels, a set of samples,  $(\omega_1, \dots, \omega_D)$  could be drawn from  $p(\omega)$ , such that the expectation  $\mathbb{E}_{\omega}$  could be estimated using a finite sum. Thus letting

$$z_{\omega}(x) = \sqrt{\frac{1}{D}} [\cos(w'_1 x), \dots, \cos(w'_D x), \sin(w'_1 x), \dots, \sin(w'_D x)],$$

we will have  $\frac{1}{D} z_{\omega}(x)' z_{\omega}(y) \approx k(x, y)$ . Taking the example of Gaussian kernel  $k(x, y) = \exp(-\frac{\|x-y\|^2}{2t})$ , the distribution  $p(\omega) = \exp\left(-\frac{t\|\omega\|^2}{2d}\right)$ .

Our Fredholm kernel could also leverage this technique to process the large scale data. Suppose the inside kernel  $k_{\mathcal{H}}$  in the definition of Fredholm kernel is Gaussian kernel with kernel width  $t$ . Using the random Fourier feature, we will have a random feature map  $z$  to approximate the kernel  $k_{\mathcal{H}}$ , such that  $\frac{1}{D} z_{\omega}(u)' z_{\omega}(v) \approx k_{\mathcal{H}}(u, v)$ . Plug this approximation into the definition of Fredholm kernel in

Eqn 5, we have

$$\begin{aligned}\hat{k}_F(x, z) &\approx \frac{1}{(l+u)^2} \sum_{i,j=1}^{l+u} k(x, x_i) \left( \frac{1}{D} z_\omega(x_i)' z_\omega(x_j) \right) k(z, x_j) \\ &= \frac{1}{D} \left( \frac{1}{(l+u)} \sum_{i=1}^{l+u} k(x, x_i) z_\omega(x_i) \right)^T \left( \frac{1}{(l+u)} \sum_{j=1}^{l+u} k(z, x_j) z_\omega(x_j) \right)\end{aligned}$$

Thus, let

$$z_F(x) = \frac{1}{l+u} \sum_{i=1}^{l+u} k(x, x_i) z_\omega(x_i),$$

we will have  $\hat{k}_F(x, z) \approx \frac{1}{D} z_F(x)' z_F(z)$ . Using the approximation, we do not need to store the whole kernel matrix  $K_{\mathcal{H}}$  of size  $(l+u) \times (l+u)$ . In this way, the memory usage will be reduced significantly. And it makes large scale learning using Fredholm kernel more feasible.

## References

- [1] Mikhail Belkin, Partha Niyogi, and Vikas Sindhwani. Manifold regularization: A geometric framework for learning from labeled and unlabeled examples. *Journal of Machine Learning Research*, 7:2399–2434, 2006.
- [2] Oliver Chapelle, Jason Weston, and Bernhard Schölkopf. Cluster kernels for semi-supervised learning. In *Advances in Neural Information Processing Systems 17*, pages 585–592, 2003.
- [3] Oliver Chapelle and Alexander Zien. Semi-supervised classification by low density separation. In Robert G. Cowell and Zoubin Ghahramani, editors, *AISTATS*, pages 57–64, 2005.
- [4] Arthur Gretton, Alex Smola, Jiayuan Huang, Marcel Schmittfull, Karsten Borgwardt, and Bernhard Schölkopf. Covariate shift by kernel mean matching. *Dataset shift in machine learning*, pages 131–160, 2009.
- [5] S. Grünwälder, G. Lever, L. Baldassarre, S. Patterson, A. Gretton, and M. Pontil. Conditional mean embeddings as regressors. In *Proceedings of the 29th International Conference on Machine Learning*, volume 2, pages 1823–1830, 2012.
- [6] Michiel Hazewinkel. *Encyclopaedia of Mathematics*, volume 4. Springer, 1989.
- [7] Thorsten Joachims. Transductive inference for text classification using support vector machines. In *The 16th International Conference on Machine Learning*, pages 200–209, Bled, Slovenien, 1999.
- [8] Ian T. Jolliffe. A note on the use of principal components in regression. *Journal of the Royal Statistical Society. Series C (Applied Statistics)*, 31(3):pp. 300–303, 1982.
- [9] Krikamol Muandet, Kenji Fukumizu, Bharath Sriperumbudur, Arthur Gretton, and Bernhard Schölkopf. Kernel mean shrinkage estimators. *arXiv preprint arXiv:1405.5505*, 2014.
- [10] Qichao Que and Mikhail Belkin. Inverse density as an inverse problem: the fredholm equation approach. In *Advances in Neural Information Processing Systems 26*, pages 1484–1492, 2013.
- [11] Ali Rahimi and Ben Recht. Random features for large-scale kernel machines. In *Advances in Neural Information Processing Systems 22*, pages 1177–1184, 2008.
- [12] Bernhard Schölkopf and Alexander J Smola. *Learning with kernels: Support vector machines, regularization, optimization, and beyond*. MIT press, 2001.
- [13] John Shawe-Taylor and Nello Cristianini. *Kernel methods for pattern analysis*. Cambridge university press, 2004.
- [14] Vikas Sindhwani, Partha Niyogi, and Mikhail Belkin. Beyond the point cloud: from transductive to semi-supervised learning. In *Proceedings of the 22nd International Conference on Machine Learning*, pages 824–831, New York, NY, USA, 2005. ACM Press.
- [15] Masashi Sugiyama, Matthias Krauledat, and Klaus-Robert Müller. Covariate shift adaptation by importance weighted cross validation. *Journal of Machine Learning Research*, 8:985–1005, 2007.

- [16] SVN Vishwanathan, Alexander J Smola, and René Vidal. Binet-cauchy kernels on dynamical systems and its application to the analysis of dynamic scenes. *International Journal of Computer Vision*, 73(1):95–119, 2007.

## A Proofs

### A.1 Lemma 1: The Representer’s Theorem For Fredholm Learning

*Proof.* Define the empirical loss function for the learning problem,

$$L(f) = \frac{1}{l} \sum_{i=1}^l ((\mathcal{K}_{\hat{p}_X} f)(x_i) - y_i)^2 + \lambda \|f\|_{\mathcal{H}}^2.$$

First let  $\mathcal{H}_X$  be the sub-space of  $\mathcal{H}$ , spanned by kernel functions centered at the data points,  $k_{\mathcal{H}}(x, x_i)$  for  $i = 1, \dots, l + u$ . For the optimal solution of Eqn 3, we can have the orthogonal decomposition,

$$f^*(x) = f_X + f_{\perp},$$

where  $f_X \in \mathcal{H}_X$  and  $f_{\perp}$  is its orthogonal complement. By its definition,  $f_{\perp}(x_i) = \langle f_{\perp}, k_{\mathcal{H}}(x, x_i) \rangle_{\mathcal{H}} = 0$  for  $i = 1, \dots, l + u$ . Thus, the first term in the loss function  $L(f)$  can be expanded as

$$\begin{aligned} \frac{1}{l} \sum_{i=1}^l ((\mathcal{K}_{\hat{p}_X} f^*)(x_i) - y_i)^2 &= \frac{1}{l} \sum_{i=1}^l \left( \frac{1}{l+u} k_{\mathcal{H}}(x_i, x_j) f^*(x_j) - y_i \right)^2 \\ &= \frac{1}{l} \sum_{i=1}^l \left( \frac{1}{l+u} \sum_{j=1}^{l+u} k_{\mathcal{H}}(x_i, x_j) (f_X(x_j) + f_{\perp}(x_j)) - y_i \right)^2 = \frac{1}{l} \sum_{i=1}^l \left( \frac{1}{l+u} \sum_{j=1}^{l+u} k_{\mathcal{H}}(x_i, x_j) f_X(x_j) - y_i \right)^2 \\ &= \frac{1}{l} \sum_{i=1}^l ((\mathcal{K}_{\hat{p}_X} f_X)(x_i) - y_i)^2 \end{aligned}$$

So the orthogonal complement of  $f_X$  does not matter at all for the empirical risk function.

For the regularization norm, we can use the pythagorean theorem in functional space.

$$\|f^*\|_{\mathcal{H}}^2 = \|f_X\|_{\mathcal{H}}^2 + \|f_{\perp}\|_{\mathcal{H}}^2,$$

thus,  $\|f_X\|_{\mathcal{H}}^2 \leq \|f^*\|_{\mathcal{H}}^2$ . Combine the results above, we have

$$\begin{aligned} L(f_X) &= \frac{1}{l} \sum_{i=1}^l ((\mathcal{K}_{\hat{p}_X} f_X)(x_i) - y_i)^2 + \lambda \|f_X\|_{\mathcal{H}}^2 \\ &\leq \frac{1}{l} \sum_{i=1}^l ((\mathcal{K}_{\hat{p}_X} f^*)(x_i) - y_i)^2 + \lambda (\|f_X\|_{\mathcal{H}}^2 + \|f_{\perp}\|_{\mathcal{H}}^2) \leq L(f^*). \end{aligned}$$

By the definition of  $f^*$ , we have  $f_X = f^*$ . □

### A.2 Proposition 3: Positive Semi-definiteness Of Fredholm Kernel

*Proof.* For any given  $z_1, \dots, z_p$ , we have the  $p \times p$  Fredholm kernel matrix with

$$(K_F)_{mn} = \frac{1}{(l+u)^2} \sum_{i,j} k(z_m, x_i) k_{\mathcal{H}}(x_i, x_j) k(z_n, x_j).$$

Given a  $p \times 1$  vector  $\alpha$ , we have

$$\begin{aligned} \alpha^T K_F \alpha &= \sum_{m,n} \alpha_m \alpha_n \frac{1}{(l+u)^2} \sum_{i,j} k(z_m, x_i) k_{\mathcal{H}}(x_i, x_j) k(z_n, x_j) \\ &= \frac{1}{(l+u)^2} \sum_{i,j} \left( \sum_m \alpha_m k(z_m, x_i) \right) \left( \sum_n \alpha_n k(z_n, x_j) \right) k_{\mathcal{H}}(x_i, x_j) \geq 0 \end{aligned}$$

due to the positive semi-definiteness of  $k_{\mathcal{H}}$ .

A similar argument can establish the same claim for the normalized version of Fredholm kernel in Eq 6.  $\square$

### A.3 Proof for Theorem 4

*Proof.* Recall that  $\Sigma_F = \int \int uv^T k_{\mathcal{H}}(u, v) p(u) p(v) dudv$ . Now substituting the distribution  $p$  for unlabeled data and  $k_{\mathcal{H}}$  as specified in the theorem, we have:

$$\begin{aligned} \Sigma_F &= \int \int uv^T k_{\mathcal{H}}(u, v) p(u) p(v) dudv \\ &= \frac{1}{(2\pi)^D \prod_d \sigma_d^2} \int \int uv^T \prod_d \exp\left(-\frac{(u_d - v_d)^2}{2t}\right) \exp\left(-\frac{(u_d - \mu_d)^2}{2\sigma_d^2}\right) \exp\left(-\frac{(v_d - \mu_d)^2}{2\sigma_d^2}\right) dudv \end{aligned}$$

$\Sigma_F$  is a matrix, and we compute its entries separately. First, for the diagonal entries of  $\Sigma_F$ , we have for any  $i \in [1, D]$ ,

$$\begin{aligned} (\Sigma_F)_{ii} &= \frac{1}{(2\pi)^d \prod_j \sigma_j^2} \int u_i v_i \prod_j \exp\left(-\frac{(u_j - v_j)^2}{2t}\right) \exp\left(-\frac{(u_j - \mu_j)^2}{2\sigma_j^2}\right) \exp\left(-\frac{(v_j - \mu_j)^2}{2\sigma_j^2}\right) dudv \\ &= \frac{1}{(2\pi)^d \prod_j \sigma_j^2} \int u_i v_i \prod_j \exp\left(-\frac{(u_j - \frac{\sigma_j^2 v_j + t\mu_j}{t + \sigma_j^2})^2}{2\frac{t\sigma_j^2}{t + \sigma_j^2}}\right) \exp\left(-\frac{(v_j - \mu_j)^2}{2\frac{\sigma_j^2(t + \sigma_j^2)}{t + 2\sigma_j^2}}\right) dudv \\ &= \frac{1}{(2\pi)^{\frac{d}{2}}} \prod_j \frac{1}{\sigma_j^2} \left(\frac{t\sigma_j^2}{t + \sigma_j^2}\right)^{\frac{1}{2}} \int \left(\frac{\sigma_i^2 v_i^2 + t\mu_i v_i}{t + \sigma_i^2}\right) \prod_j \exp\left(-\frac{(v_j - \mu_j)^2}{2\frac{\sigma_j^2(t + \sigma_j^2)}{t + 2\sigma_j^2}}\right) dv \\ &= \prod_j \frac{1}{\sigma_j^2} \left(\frac{t\sigma_j^2}{t + \sigma_j^2} \frac{\sigma_j^2(t + \sigma_j^2)}{t + 2\sigma_j^2}\right)^{\frac{1}{2}} \left(\frac{\sigma_i^2 \left(\mu_i^2 + \frac{\sigma_i^2(t + \sigma_i^2)}{t + 2\sigma_i^2}\right) + t\mu_i^2}{t + \sigma_i^2}\right) \\ &= \prod_j \sqrt{\frac{t}{t + 2\sigma_j^2}} \left(\mu_i^2 + \frac{\sigma_i^4}{t + 2\sigma_i^2}\right). \end{aligned}$$

For the off-diagonal entries,  $(\Sigma_F)_{ij}$ ,  $1 \leq i \neq j \leq D$ , similar computation gives us the following

$$\begin{aligned} (\Sigma_F)_{ij} &= \frac{1}{(2\pi)^D \prod_d \sigma_d^2} \int \int u_i v_j \prod_d \exp\left(-\frac{(u_d - v_d)^2}{2t}\right) \exp\left(-\frac{(u_d - \mu_d)^2}{2\sigma_d^2}\right) \exp\left(-\frac{(v_d - \mu_d)^2}{2\sigma_d^2}\right) dudv \\ &= \prod_d \sqrt{\frac{t}{t + 2\sigma_d^2}} \mu_i \mu_j. \end{aligned}$$

Put the above results together, we have the theorem.  $\square$

### A.4 Proof For Lemma 7

First, we need the following result and we include its proof for completeness.

**Lemma 9.** Given a random variable  $Z = X^T Y$ , where  $X, Y$  are two independent random vector, we have

$$\mathbb{E}(Z) = \mathbb{E}(X)^T \mathbb{E}(Y)$$

and

$$\text{Var}(Z) = \sum_{i=1}^D (\mathbb{E}(X_i)^2 \text{Var}(Y_i) + \mathbb{E}(Y_i)^2 \text{Var}(X_i) + \text{Var}(X_i) \text{Var}(Y_i))$$



*Proof.* For expected value, we have

$$\mathbb{E}(Z) = \mathbb{E}(X^T Y) = \mathbb{E}\left(\sum_{i=1}^D X_i Y_i\right) = \sum_{i=1}^D \mathbb{E}(X_i Y_i) = \sum_{i=1}^D \mathbb{E}(X_i) \mathbb{E}(Y_i) = \mathbb{E}(X)^T \mathbb{E}(Y).$$

To compute variance, we first compute the second moment of  $Z$ ,

$$\begin{aligned} \mathbb{E}(Z^2) &= \mathbb{E}\left(\left(\sum_{i=1}^D X_i Y_i\right)^2\right) = \mathbb{E}\left(\sum_{i,j=1}^D X_i X_j Y_i Y_j\right) \\ &= \sum_{i \neq j} \mathbb{E}(X_i) \mathbb{E}(X_j) \mathbb{E}(Y_i) \mathbb{E}(Y_j) + \sum_{i=j} \mathbb{E}(X_i^2) \mathbb{E}(Y_i^2) \\ &= \sum_{i \neq j} \mathbb{E}(X_i) \mathbb{E}(X_j) \mathbb{E}(Y_i) \mathbb{E}(Y_j) + \sum_{i=1}^D (\mathbb{E}(X_i)^2 + \text{Var}(X_i)) (\mathbb{E}(Y_i)^2 + \text{Var}(Y_i)) \\ &= (\mathbb{E}(X)^T \mathbb{E}(Y))^2 + \sum_{i=1}^D (\mathbb{E}(X_i)^2 \text{Var}(Y_i) + \mathbb{E}(Y_i)^2 \text{Var}(X_i) + \text{Var}(X_i) \text{Var}(Y_i)) \end{aligned}$$

Thus, the variance of  $Z$  is

$$\text{Var}(Z) = \sum_{i=1}^D (\mathbb{E}(X_i)^2 \text{Var}(Y_i) + \mathbb{E}(Y_i)^2 \text{Var}(X_i) + \text{Var}(X_i) \text{Var}(Y_i))$$

□

Now we can give the proof for **Lemma 7**.

*Proof.* By the assumption we have that the distribution  $p$  for unlabelled points is a Gaussian distribution  $N(0, \text{diag}([\lambda^2 I_d, \sigma^2 I_{D-d}]))$ . Our goal is to compute the following  $k_F(x_e, z_e)$ .

$$\begin{aligned} k_F(x_e, z_e) &= \int \int \frac{k(x_e, u)}{\int k(x_e, w) p(w) dw} \frac{k(z_e, v)}{\int k(z_e, w) p(w) dw} (u^T v) p(u) p(v) du dv \\ &= \left( \frac{\int k(x_e, u) u p(u) du}{\int k(x_e, w) p(w) dw} \right)^T \left( \frac{\int k(z_e, v) v p(v) dv}{\int k(z_e, w) p(w) dw} \right) := (m_x)^T (m_z). \end{aligned}$$

Note that we define  $m_x, m_z$  to simplify the notations. And since  $m_x, m_z$  are in the same form, we will only compute  $m_x$ , the formula for  $m_z$  can be derived by the same computation. First, the denominator can be expended as

$$\begin{aligned} &\int k(x_e, w) p(w) dw \\ &= \frac{1}{(2\pi)^{D/2} (\lambda^2)^{d/2} (\sigma^2)^{(D-d)/2}} \int \prod_{i=1}^D \exp\left(-\frac{((x_e)_i - w_i)^2}{2t}\right) \prod_{i=1}^d \exp\left(-\frac{w_i^2}{2\lambda^2}\right) \prod_{i=d+1}^D \exp\left(-\frac{w_i^2}{2\sigma^2}\right) du \\ &= \frac{1}{(2\pi)^{D/2} (\lambda^2)^{d/2} (\sigma^2)^{(D-d)/2}} \int \prod_{i=1}^d \exp\left(-\frac{(w_i - \frac{\lambda^2 (x_e)_i}{t + \lambda^2})^2}{2 \frac{t\lambda^2}{t + \lambda^2}}\right) \exp\left(-\frac{(x_e)_i^2}{2(t + \lambda^2)}\right) \\ &\quad \prod_{i=d+1}^D \exp\left(-\frac{(w_i - \frac{\sigma^2 (x_e)_i}{t + \sigma^2})^2}{2 \frac{t\sigma^2}{t + \sigma^2}}\right) \exp\left(-\frac{(x_e)_i^2}{2(t + \sigma^2)}\right) du \\ &= \left(\frac{t}{t + \lambda^2}\right)^{d/2} \left(\frac{t}{t + \sigma^2}\right)^{(D-d)/2} \prod_{i=1}^d \exp\left(-\frac{(x_e)_i^2}{2(t + \lambda^2)}\right) \prod_{i=d+1}^D \exp\left(-\frac{(x_e)_i^2}{2(t + \sigma^2)}\right) \end{aligned}$$

$$\begin{aligned}
m_x &= \frac{\frac{1}{(2\pi)^{D/2}(\lambda^2)^{d/2}(\sigma^2)^{(D-d)/2}}}{\int k(x_e, w)p(w)dw} \int uk(x_e, u) \prod_{i=1}^d \exp\left(-\frac{u_i^2}{2\lambda^2}\right) \prod_{i=d+1}^D \exp\left(-\frac{u_i^2}{2\sigma^2}\right) du \\
&= \frac{\frac{1}{(2\pi)^{D/2}(\lambda^2)^{d/2}(\sigma^2)^{(D-d)/2}}}{\int k(x_e, w)p(w)dw} \int u \prod_{i=1}^D \exp\left(-\frac{((x_e)_i - u_i)^2}{2t}\right) \prod_{i=1}^d \exp\left(-\frac{u_i^2}{2\lambda^2}\right) \prod_{i=d+1}^D \exp\left(-\frac{u_i^2}{2\sigma^2}\right) du \\
&= \frac{\frac{1}{(2\pi)^{D/2}(\lambda^2)^{d/2}(\sigma^2)^{(D-d)/2}}}{\int k(x_e, w)p(w)dw} \int u \prod_{i=1}^d \exp\left(-\frac{(u_i - \frac{\lambda^2(x_e)_i}{t+\lambda^2})^2}{2\frac{t\lambda^2}{t+\lambda^2}}\right) \exp\left(-\frac{(x_e)_i^2}{2(t+\lambda^2)}\right) \\
&\quad \prod_{i=d+1}^D \exp\left(-\frac{(u_i - \frac{\sigma^2(x_e)_i}{t+\sigma^2})^2}{2\frac{t\sigma^2}{t+\sigma^2}}\right) \exp\left(-\frac{(x_e)_i^2}{2(t+\sigma^2)}\right) du \\
&= \left[\frac{\lambda^2(x_e)_1}{t+\lambda^2}, \dots, \frac{\lambda^2(x_e)_d}{t+\lambda^2}, \frac{\sigma^2(x_e)_{d+1}}{t+\sigma^2}, \dots, \frac{\sigma^2(x_e)_D}{t+\sigma^2}\right] \\
&= \frac{\lambda^2}{t+\lambda^2} \bar{x} + \frac{\sigma^2}{t+\sigma^2} (x_e - \bar{x}).
\end{aligned}$$

The last equation is because  $x_e$  only has noises in the last  $D-d$  coordinates, thus it has the same first  $d$  coordinates with  $\bar{x}$  up to a rescaling factor. Note that  $x_e - \bar{x}$  is the noise term. If  $t$  is significant large than the variance  $\sigma^2$  for noise, then this noise term will be suppressed significantly. To apply Lemma 9, we need to compute the expected value and variance of  $m_x$ . It is easy to see:

$$\mathbb{E}(m_x) = \frac{\lambda^2}{t+\lambda^2} \bar{x}.$$

Since  $x_e - \bar{x}$  accounts for the randomness of  $m_x$ , and since  $x_e \sim N(\bar{x}, \text{diag}([\mathbf{0}_d, \sigma^2 I_{D-d}]))$ , it follows that  $\text{Var}((m_x)_i) = 0$  for  $i \leq d$ . For  $d < i \leq D$ , we have

$$\text{Var}((m_x)_i) = \left(\frac{\sigma^2}{t+\sigma^2}\right)^2 \sigma^2.$$

Applying Lemma 9, we have

$$\mathbb{E}(m_x^T m_z) = \left(\frac{\lambda^2}{t+\lambda^2}\right)^2 \bar{x}^T \bar{z},$$

and

$$\text{Var}(m_x^T m_z) = (D-d) \left(\frac{\sigma^2}{t+\sigma^2}\right)^4 \sigma^4.$$

(The derivation of the variance above uses the fact that  $\bar{x}$  and  $\bar{z}$  are located on the subspace of  $\mathbb{R}^D$  spanned by the first  $d$  axes.) Thus, by multiplying  $k_F$  by the normalizing term  $\left(\frac{t+\lambda^2}{\lambda^2}\right)^2$ , we prove the theorem.  $\square$

## A.5 Proof for Theorem 8

To prove this theorem, we first characterize the approximation  $k_{\mathcal{H}}^{\text{target}}(x_e, z_e)$  using kernel  $k_{\mathcal{H}}^{\text{target}}$ , in term of its mean and variance, by the following lemma.

**Lemma 10.** *Given  $\bar{x}, \bar{z}$ , and two noise samples  $x_e \sim N(\bar{x}, \text{diag}([\mathbf{0}_d, \sigma^2 I_{D-d}]))$ ,  $z_e \sim N(\bar{z}, \text{diag}([\mathbf{0}_d, \sigma^2 I_{D-d}]))$ . Let  $k_{\mathcal{H}}^{\text{target}}(x_e, z_e) = \exp\left(-\frac{\|x_e - z_e\|^2}{2r}\right)$  and  $c_1 = \left(\frac{r}{r+2\sigma^2}\right)^{(D-d)/2}$ , we have*

$$\mathbb{E}_{x_e, z_e}(c_1^{-1} k_{\mathcal{H}}^{\text{target}}(x_e, z_e)) = \exp\left(-\frac{\|\bar{x} - \bar{z}\|^2}{2r}\right),$$

and

$$\text{Var}_{x_e, z_e}(c_1^{-1} k_{\mathcal{H}}^{\text{target}}(x_e, z_e)) = \left(\left(\frac{(r+2\sigma^2)^2}{r(r+4\sigma^2)}\right)^{(D-d)/2} - 1\right) \exp\left(-\frac{\|\bar{x} - \bar{z}\|^2}{r}\right)$$

*Proof.* First of all, let us compute the expectation of  $k_{\mathcal{H}}^{\text{target}}(x_e, z_e)$ . Note that the first  $d$  coordinates of  $x_e, z_e$  are deterministic in our setting.

$$\begin{aligned}
& \mathbb{E}_{x_e, z_e}(k_{\mathcal{H}}^{\text{target}}(x_e, z_e)) \\
&= \int k_{\mathcal{H}}^{\text{target}}(x_e, z_e) p(x_e) p(z_e) dx_e dz_e \\
&= \frac{1}{(2\pi\sigma^2)^{D-d}} \prod_{i=1}^d \exp\left(-\frac{((\bar{x})_i - (\bar{z})_i)^2}{2r}\right) \times \\
& \quad \int \prod_{i=d+1}^D \exp\left(-\frac{((x_e)_i - (z_e)_i)^2}{2r}\right) \exp\left(-\frac{(x_e)_i^2}{2\sigma^2}\right) \exp\left(-\frac{(z_e)_i^2}{2\sigma^2}\right) dx_e dz_e \\
&= \frac{1}{(2\pi\sigma^2)^{D-d}} \exp\left(-\frac{\|\bar{x} - \bar{z}\|^2}{2r}\right) \times \\
& \quad \int \prod_{i=d+1}^D \exp\left(-\frac{\left((x_e)_i - \frac{\sigma^2(z_e)_i}{r+\sigma^2}\right)^2}{2\frac{r\sigma^2}{r+\sigma^2}}\right) \exp\left(-\frac{(z_e)_i^2}{2\frac{\sigma^2(r+\sigma^2)}{r+2\sigma^2}}\right) dx_e dz_e \\
&= \frac{1}{(\sigma^2)^{D-d}} \left(\frac{r\sigma^2}{r+\sigma^2} \frac{\sigma^2(r+\sigma^2)}{r+2\sigma^2}\right)^{\frac{D-d}{2}} \exp\left(-\frac{\|\bar{x} - \bar{z}\|^2}{2r}\right) \\
&= \left(\frac{r}{r+2\sigma^2}\right)^{\frac{D-d}{2}} \exp\left(-\frac{\|\bar{x} - \bar{z}\|^2}{2r}\right).
\end{aligned}$$

Thus, let  $c_1 = \left(\frac{r}{r+2\sigma^2}\right)^{\frac{D-d}{2}}$ , we have  $\mathbb{E}_{x_e, z_e}(c_1^{-1} k_{\mathcal{H}}^{\text{target}}(x_e, z_e)) = \exp\left(-\frac{\|\bar{x} - \bar{z}\|^2}{2r}\right)$ .

Similarly, we will get the second moment.

$$\mathbb{E}_{x_e, z_e}(k_{\mathcal{H}}^{\text{target}}(x_e, z_e)^2) = \left(\frac{r}{r+4\sigma^2}\right)^{\frac{D-d}{2}} \exp\left(-\frac{\|\bar{x} - \bar{z}\|^2}{r}\right).$$

Using  $\text{Var}_{x_e, z_e}(c_1^{-1} k_{\mathcal{H}}^{\text{target}}(x_e, z_e)) = c_1^{-2} (\mathbb{E}_{x_e, z_e}(k_{\mathcal{H}}^{\text{target}}(x_e, z_e)^2) - \mathbb{E}_{x_e, z_e}(k_{\mathcal{H}}^{\text{target}}(x_e, z_e))^2)$ , we have the result for variance.  $\square$

Now consider the behavior of the Fredholm kernel. Under our specific setting, we know the distribution  $p_X$ , the integral in the definition of Fredholm kernel in Eq 9 could be computed explicitly. To keep our point clear, we omit the constant coefficient,

$$\begin{aligned}
k_F(x_e, z_e) &\propto \exp\left(-\frac{\|\bar{x} - \bar{z}\|^2}{2\frac{t(t+3\lambda^2)(t+\lambda^2)}{\lambda^4}}\right) \exp\left(-\frac{\|(x_e - \bar{x}) - (z_e - \bar{z})\|^2}{2\frac{t(t+3\sigma^2)(t+\sigma^2)}{\sigma^4}}\right) \\
&= \exp\left(-\frac{\|x_0 - z_0\|^2}{2\frac{t(t+3\lambda^2)(t+\lambda^2)}{\lambda^4}}\right)
\end{aligned}$$

where  $x_0 = \bar{x} + \eta(x_e - \bar{x})$ ,  $z_0 = \bar{z} + \eta(z_e - \bar{z})$ , and  $\eta = \frac{\sigma^4(st+s\lambda^2+2t\lambda^2)(t+\lambda^2)}{\lambda^4(st+s\sigma^2+2t\sigma^2)(t+\sigma^2)}$ . Since  $\sigma^2$  is the variance for noise,  $\sigma^2 < \lambda^2$ , and thus  $\eta < 1$ . It can be observed that the resulting Fredholm kernel is still a Gaussian kernel. By selecting  $t$  properly, the kernel width could match the original kernel, while the center of new kernel,  $x_0, z_0$ , becomes closer to  $x, z$  than the original center  $x_e, z_e$ . Intuitively, this Fredholm kernel gives a more stable estimator for  $k_{\mathcal{H}}^{\text{target}}$ .

To formulate this idea strictly, we have the following lemma.

**Lemma 11.** Given  $\bar{x}, \bar{z}$ , and two noise sample  $x_e \sim N(\bar{x}, \text{diag}([\mathbf{0}_d, \sigma^2 I_{D-d}]))$ ,  $z_e \sim N(\bar{z}, \text{diag}([\mathbf{0}_d, \sigma^2 I_{D-d}]))$ . Suppose distribution of unlabeled data is  $N(0, \text{diag}([\lambda^2 I_d, \sigma^2 I_{D-d}]))$ .

Letting  $c_2 = \left(\frac{t(t+\sigma^2)^2}{t^3+4t^2\sigma^2+3t\sigma^4+2\sigma^6}\right)^{(D-d)/2} \left(\frac{t(t+\lambda^2)}{t(t+3\lambda^2)}\right)^{d/2}$ , we have

$$\mathbb{E}_{x_e, z_e}(c_2^{-1} k_F(x_e, z_e)) = \exp\left(-\frac{\|\bar{x} - \bar{z}\|^2}{2\frac{t(t+\lambda^2)(t+3\lambda^2)}{\lambda^4}}\right),$$

and

$$\text{Var}_{x_e, z_e}(c_2^{-1}k_F(x_e, z_e)) = \left( \left( \frac{(t^3 + 4t^2\sigma^2 + 3t\sigma^4 + 2\sigma^6)^2}{t(t + \sigma^2)(t + 3\sigma^2)(t^3 + 4t^2\sigma^2 + 3t\sigma^4 + 4\sigma^6)} \right)^{(D-d)/2} - 1 \right) \exp \left( -\frac{\|\bar{x} - \bar{z}\|^2}{\frac{(t+\lambda^2)(t^2+3t\lambda^2)}{\lambda^4}} \right)$$

We can see that the difference between Fredholm kernel and the original kernel  $k_{\mathcal{H}}^{\text{target}}$  is the kernel width. Thus we can choose  $t$  and  $s$  properly in Fredholm kernel such that the kernel width matches the one in  $k_{\mathcal{H}}^{\text{target}}$  before comparing the variances.

Now we can give the proof for Theorem 8.

*Proof.* First, by setting  $r = \frac{(t+\lambda^2)(st+s\lambda^2+2t\lambda^2)}{\lambda^4}$ , we make the two approximations have the same expected value. Thus, it suffices to compare the variances of the adjusted approximations. With the  $r$  plugged into the variance in Proposition 10, it suffices to show that

$$\begin{aligned} & \frac{\left( \frac{(t+\lambda^2)(st+s\lambda^2+2t\lambda^2)}{\lambda^4} + 2\sigma^2 \right)^2}{\frac{(t+\lambda^2)(st+s\lambda^2+2t\lambda^2)}{\lambda^4} \left( \frac{(t+\lambda^2)(st+s\lambda^2+2t\lambda^2)}{\lambda^4} + 4\sigma^2 \right)} > \\ & \frac{(st^2 + 2st\sigma^2 + 2t^2\sigma^2 + s\sigma^4 + 2t\sigma^4 + 2\sigma^6)^2}{(t + \sigma^2)(st + s\sigma^2 + 2t\sigma^2)(st^2 + 2st\sigma^2 + 2t^2\sigma^2 + s\sigma^4 + 2t\sigma^4 + 4\sigma^6)} \\ & = \frac{\left( \frac{(t+\sigma^2)(st+s\sigma^2+2t\sigma^2)}{\sigma^4} + 2\sigma^2 \right)^2}{\frac{(t+\sigma^2)(st+s\sigma^2+2t\sigma^2)}{\sigma^4} \left( \frac{(t+\sigma^2)(st+s\sigma^2+2t\sigma^2)}{\sigma^4} + 4\sigma^2 \right)} \end{aligned}$$

Since we have  $\frac{(t+\sigma^2)(st+s\sigma^2+2t\sigma^2)}{\sigma^4} > \frac{(t+\lambda^2)(st+s\lambda^2+2t\lambda^2)}{\lambda^4}$  and the function  $\frac{r+2\sigma^2}{r(r+4\sigma^2)}$  is decreasing w.r.t.  $r$ , we have the inequality.  $\square$

### A.5.1 Proof For Lemma 11

Here, we will prove the general case that uses different kernel widths for  $k$  and  $k_{\mathcal{H}}$ . Then one can simply set them to be the same to get **Lemma 11**.

Here's the new Lemma we will prove.

**Lemma 12.** Given  $\bar{x}, \bar{z}$ , and two noise sample  $x_e \sim N(\bar{x}, \text{diag}([\mathbf{0}_d, \sigma^2 I_{D-d}]))$ ,  $z_e \sim N(\bar{z}, \text{diag}([\mathbf{0}_d, \sigma^2 I_{D-d}]))$ . Suppose distribution of unlabeled data is  $N(0, \text{diag}([\lambda^2 I_d, \sigma^2 I_{D-d}]))$ . Thus, we have

$$\mathbb{E}_{x_e, z_e}(k_F(x_e, z_e)) = \left( \frac{s(t + \sigma^2)^2}{st^2 + 2st\sigma^2 + 2t^2\sigma^2 + s\sigma^4 + 2t\sigma^4 + 2\sigma^6} \right)^{(D-d)/2} \left( \frac{s(t + \lambda^2)}{st + s\lambda^2 + 2t\lambda^2} \right)^{d/2} \exp \left( -\frac{\|\bar{x} - \bar{z}\|^2}{2 \frac{(t+\lambda^2)(st+s\lambda^2+2t\lambda^2)}{\lambda^4}} \right).$$

Let  $c_2 = \left( \frac{s(t+\sigma^2)^2}{st^2 + 2st\sigma^2 + 2t^2\sigma^2 + s\sigma^4 + 2t\sigma^4 + 2\sigma^6} \right)^{(D-d)/2} \left( \frac{s(t+\lambda^2)}{st + s\lambda^2 + 2t\lambda^2} \right)^{d/2}$ . We have

$$\begin{aligned} \text{Var}_{x_e, z_e}(c_2^{-1}k_F(x_e, z_e)) &= \left( \left( \frac{(st^2 + 2st\sigma^2 + 2t^2\sigma^2 + s\sigma^4 + 2t\sigma^4 + 2\sigma^6)^2}{(t + \sigma^2)(st + s\sigma^2 + 2t\sigma^2)(st^2 + 2st\sigma^2 + 2t^2\sigma^2 + s\sigma^4 + 2t\sigma^4 + 4\sigma^6)} \right)^{(D-d)/2} - 1 \right) \\ &\exp \left( -\frac{\|\bar{x} - \bar{z}\|^2}{\frac{(t+\lambda^2)(st+s\lambda^2+2t\lambda^2)}{\lambda^4}} \right) \end{aligned}$$

*Proof.* Again, since we know the exact distribution of the unlabeled data, we can compute the close formula of  $k_F(x_e, z_e)$ .

$$\begin{aligned} k_F(x_e, z_e) &= \int \int \frac{k(x_e, u)}{\int k(x_e, w)p(w)dw} \frac{k(z_e, v)}{\int k(z_e, w)p(w)dw} k_{\mathcal{H}}(u, v)p(u)p(v)dudv \\ &= \left( \frac{s(t + \lambda^2)}{st + s\lambda^2 + 2t\lambda^2} \right)^{d/2} \left( \frac{s(t + \sigma^2)}{st + s\sigma^2 + 2t\sigma^2} \right)^{(D-d)/2} \times \\ &\quad \exp \left( -\frac{\|\bar{x} - \bar{z}\|^2}{2 \frac{(st + s\lambda^2 + 2t\lambda^2)(t + \lambda^2)}{\lambda^4}} \right) \exp \left( -\frac{\|(x_e - \bar{x}) - (z_e - \bar{z})\|^2}{2 \frac{(st + s\sigma^2 + 2t\sigma^2)(t + \sigma^2)}{\sigma^4}} \right) \end{aligned}$$

Based on this computation, we need to compute expected value and variance of  $k_F$ . Note that the randomness of  $k_F(x_e, z_e)$  comes from the term  $x_e - \bar{x}$  and  $z_e - \bar{z}$ , we take out the random variable from the above formula, and denote it

$$Z = \exp \left( -\frac{\|(x_e - \bar{x}) - (z_e - \bar{z})\|^2}{2 \frac{(st + s\sigma^2 + 2t\sigma^2)(t + \sigma^2)}{\sigma^4}} \right).$$

Recall that the distributions for  $x_e$  and  $z_e$  are  $N(\bar{x}, \text{diag}([\mathbf{0}, \sigma^2 I_{D-d}]))$  and  $N(\bar{z}, \text{diag}([\mathbf{0}, \sigma^2 I_{D-d}]))$  respectively. For expected value, we have

$$\begin{aligned} \mathbb{E}_{x_e, z_e}(Z) &= \int \exp \left( -\frac{\|(x_e - \bar{x}) - (z_e - \bar{z})\|^2}{2 \frac{(st + s\sigma^2 + 2t\sigma^2)(t + \sigma^2)}{\sigma^4}} \right) p(x_e)p(z_e)dx_e dz_e \\ &= \left( \frac{(t + \sigma^2)(st + s\sigma^2 + 2t\sigma^2)}{st^2 + 2st\sigma^2 + 2t^2\sigma^2 + s\sigma^4 + 2t\sigma^4 + 2\sigma^6} \right)^{(D-d)/2} \end{aligned}$$

And for the second moment, we have

$$\begin{aligned} \mathbb{E}_{x_e, z_e}(Z^2) &= \int \exp \left( -\frac{\|(x_e - \bar{x}) - (z_e - \bar{z})\|^2}{\frac{(st + s\sigma^2 + 2t\sigma^2)(t + \sigma^2)}{\sigma^4}} \right) p(x_e)p(z_e)dx_e dz_e \\ &= \left( \frac{(t + \sigma^2)(st + s\sigma^2 + 2t\sigma^2)}{st^2 + 2st\sigma^2 + 2t^2\sigma^2 + s\sigma^4 + 2t\sigma^4 + 4\sigma^6} \right)^{(D-d)/2} \end{aligned}$$

Thus,

$$\begin{aligned} \text{Var}(Z) &= \mathbb{E}(Z^2) - \mathbb{E}(Z)^2 = \\ &= \left( \frac{(t + \sigma^2)(st + s\sigma^2 + 2t\sigma^2)}{st^2 + 2st\sigma^2 + 2t^2\sigma^2 + s\sigma^4 + 2t\sigma^4 + 4\sigma^6} \right)^{(D-d)/2} - \left( \frac{(t + \sigma^2)(st + s\sigma^2 + 2t\sigma^2)}{st^2 + 2st\sigma^2 + 2t^2\sigma^2 + s\sigma^4 + 2t\sigma^4 + 2\sigma^6} \right)^{(D-d)} \end{aligned}$$

Now we multiply  $Z$  by the constant term, we have

$$\begin{aligned} \mathbb{E}_{x_e, z_e}(k_F(x_e, z_e)) &= \left( \frac{s(t + \sigma^2)^2}{st^2 + 2st\sigma^2 + 2t^2\sigma^2 + s\sigma^4 + 2t\sigma^4 + 2\sigma^6} \right)^{(D-d)/2} \left( \frac{s(t + \lambda^2)}{st + s\lambda^2 + 2t\lambda^2} \right)^{d/2} \\ &\quad \exp \left( -\frac{\|\bar{x} - \bar{z}\|^2}{2 \frac{(t + \lambda^2)(st + s\lambda^2 + 2t\lambda^2)}{\lambda^4}} \right). \end{aligned}$$

And let  $c_2 = \left( \frac{s(t + \sigma^2)^2}{st^2 + 2st\sigma^2 + 2t^2\sigma^2 + s\sigma^4 + 2t\sigma^4 + 2\sigma^6} \right)^{(d-l)/2} \left( \frac{s(t + \lambda^2)}{st + s\lambda^2 + 2t\lambda^2} \right)^{l/2}$ , we will have the results for the variance by scaling the variance of  $Z$  by the constant term.  $\square$
